# Supplementary material for: Antimicrobial Treatment Challenges in the Management of Infective Spondylodiscitis Associated with Hemodialysis: A Comprehensive Review of Literature and Case Series Analysis
Source: MDPI journal article supplement (doi:10.3390/antibiotics13030284), 2024-03-20
Supplement: s1 [file s1]

# Supplementary Materials

## Antimicrobial Treatment Challenges in the Management of Infective Spondylodiscitis Associated with Hemodialysis: A Comprehensive Review of Literature and Case Series Analysis

Ioana A. Ratiu <sup>1,2</sup>, Corina F. Moisa <sup>1,\*</sup>, Laura Țiburcă <sup>1,3</sup>, Edy Hagi-Islai <sup>4</sup>, Anamaria Ratiu <sup>4</sup>, Gabriel Cristian Bako <sup>1,2</sup>, Cristian Adrian Ratiu <sup>5</sup> and Liana Stefan <sup>1</sup>

Faculty of Medicine and Pharmacy, University of Oradea, 1st December Square 10, 410073 Oradea, Romania; ioana.ratiu@didactic.uoradea.ro (I.A.R.); tiburca.lauraelena@student.uoradea.ro (L.Ț.); gabriel.bako@didactic.uoradea.ro (G.C.B.); lantal@uoradea.ro (L.S.)

<sup>2</sup> Emergency Clinical Hospital Bihor County, Nephrology Department, 12 Corneliu Coposu Street, 410469 Oradea, Romania

<sup>3</sup> Emergency Clinical Hospital Bihor County, Rheumatology Department, 12 Corneliu Coposu Street, 410469 Oradea, Romania

<sup>4</sup> Faculty of Dentistry, University of Medicine and Pharmacy "Tuliu Hatieganu" Cluj-Napoca, Victor Babeș Street 8, 400347 Cluj-Napoca, Romania; hagi.islai.edy@elearn.umfcluj.ro (E.H.-I.); ratiu.anamaria@elearn.umfcluj.ro (A.R.)

<sup>5</sup> Faculty of Medicine and Pharmacy, Dentistry Department, University of Oradea, 1st December Square 10, 410073 Oradea, Romania; ratiu\_cristian@yahoo.com

\* Correspondence: corinamoisa@hotmail.com

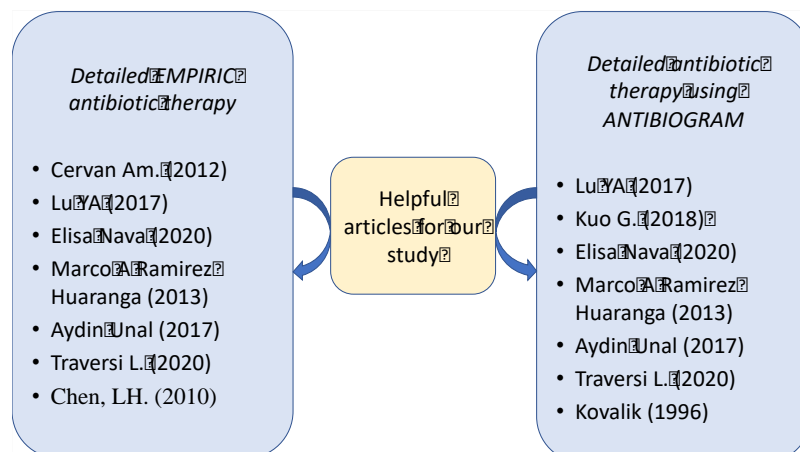

**Figure S1.** Finally selected articles useful for our statistic
